# Supplementary material for: Health Risk Assessment of Informal Food Vendors: A Comparative Study in Johannesburg, South Africa
Source: MDPI journal article supplement (doi:10.3390/ijerph20032736), 2023-02-03
Supplement: s1 [file s1]

**Table S1.** Prevalence of upper and lower respiratory symptoms and diseases among informal food vendors in the inner city of Johannesburg.

| Respiratory problems                 | Total No=617                                                                                                              | Work location                        |                                                | Type of vendor                                  |                                     | Gender    |                                               |                                                 |
|--------------------------------------|---------------------------------------------------------------------------------------------------------------------------|--------------------------------------|------------------------------------------------|-------------------------------------------------|-------------------------------------|-----------|-----------------------------------------------|-------------------------------------------------|
|                                      |                                                                                                                           | Indoor                               | Outdoor                                        | Cooking vendors                                 | Non-cooking vendors                 | Male      | Female                                        |                                                 |
|                                      |                                                                                                                           | N (%)                                | N (%)                                          | N (%)                                           | N (%)                               | N (%)     | N (%)                                         |                                                 |
| Upper symptoms in the last 12 months | Cold                                                                                                                      | 268 (43%)                            | 114 (43%)                                      | 154 (57%)                                       | 159 (59%)                           | 109 (41%) | 111 (41%)                                     | 157 (59%)                                       |
|                                      | Sore throat                                                                                                               | 258 (42%)                            | 109 (42%)                                      | 149 (58%)                                       | 152 (59%)                           | 106 (41%) | 102 (40%)                                     | 156 (60%)                                       |
|                                      | Nasal congestion                                                                                                          | 248 (40%)                            | 106 (43%)                                      | 142 (57%)                                       | 149 (60%)                           | 99 (40%)  | 101 (41%)                                     | 147 (59%)                                       |
| Lower symptoms in the last 12 months | Cough                                                                                                                     | 242 (39%)                            | 110 (46%)                                      | 132 (54%)                                       | 168 (69%)                           | 74 (31%)  | 77 (32%)                                      | 165 (68%)                                       |
|                                      | Phlegm                                                                                                                    | 125 (20%)                            | 44 (35%)                                       | 81 (65%)                                        | 77 (62%)                            | 48 (38%)  | 37 (30%)                                      | 88 (70%)                                        |
|                                      | Breathlessness                                                                                                            | 28 (5%)                              | 9 (32%)                                        | 19 (68%)                                        | 16 (57%)                            | 12 (43%)  | 8 (29%)                                       | 20 (71%)                                        |
|                                      | Wheeziness                                                                                                                | 43 (7%)                              | 18 (42%)                                       | 25 (58%)                                        | 31 (72%)                            | 12 (28%)  | 12 (28%)                                      | 31 (72%)                                        |
| Cough                                | Usually cough 1st thing in the morning in winter                                                                          | 152 (25%)                            | 67 (44%)                                       | 85 (56%)                                        | 103 (68%)                           | 49 (32%)  | 42 (28%)                                      | 110 (72%)                                       |
|                                      | Usually cough during the day or at night in the winter                                                                    | 58 (9%)                              | 31 (53%)                                       | 27 (47%)                                        | 44 (76%)                            | 14 (24%)  | 17 (29%)                                      | 41 (71%)                                        |
|                                      | Cough like this on most days for as much as three months each year                                                        | 6 (1%)                               | 1 (17%)                                        | 5 (83%)                                         | 4 (67%)                             | 2 (33%)   | 0                                             | 6 (100%)                                        |
| Phlegm                               | Usually bring up any phlegm in the morning in winter                                                                      | 73 (12%)                             | 20 (27%)                                       | 53 (73%)                                        | 42 (58%)                            | 31 (42%)  | 17 (23%)                                      | 56 (77%)                                        |
|                                      | Usually bring up any phlegm during the day or at night in the winter                                                      | 21 (3, 4%)                           | 6 (29%)                                        | 15 (71%)                                        | 18 (86%)                            | 3 (14%)   | 6 (29%)                                       | 15 (71%)                                        |
|                                      | bring up any phlegm like this on most days for as much as three months each year                                          | 2 (0, 3%)                            | 0                                              | 2 (100%)                                        | 1 (50%)                             | 1 (50%)   | 1 (50%)                                       | 1 (50%)                                         |
|                                      | in the past 3 years have you had a period of increased cough and phlegm lasting for 3 weeks or more                       | 3 (0, 5%)                            | 0                                              | 3 (100%)                                        | 2 (67%)                             | 1 (33%)   | 0                                             | 3 (100%)                                        |
|                                      | in the past 3 years have you had a period of increased cough and phlegm lasting for 3 weeks or more, more than 3 winters) | 1 (0, 2%)                            | 0                                              | 1 (100%)                                        | 0                                   | 1 (100%)  | 0                                             | 1 (100%)                                        |
| Breathlessness                       | troubled by shortness of breath when hurrying on level ground or walking up a slight hill                                 | 31 (5%)                              | 5 (16%)                                        | 26 (84%)                                        | 19 (61%)                            | 12 (39%)  | 7 (23%)                                       | 24 (77%)                                        |
|                                      | Short of breath when walking with others of your own age on level ground                                                  | 17 (2, 8%)                           | 2 (12%)                                        | 15 (88%)                                        | 12 (71%)                            | 5 (29%)   | 4 (24%)                                       | 13 (76%)                                        |
|                                      | Stops for breath when walking at your own pace on level ground?                                                           | 8 (1%)                               | 1 (12%)                                        | 7 (88%)                                         | 6 (75%)                             | 2 (25%)   | 1 (12%)                                       | 7 (88%)                                         |
| Wheeziness                           | Ever had attacks of shortness of breath with wheezing                                                                     | 30 (5%)                              | 13 (43%)                                       | 17 (57%)                                        | 23 (77%)                            | 7 (23%)   | 7 (23%)                                       | 23 (77%)                                        |
|                                      | Is/was your breathing absolutely normal between attacks? (Yes)                                                            | 13 (2.1%)                            | 5 (38%)                                        | 8 (62%)                                         | 9 (69%)                             | 4 (31%)   | 3 (23%)                                       | 10 (77%)                                        |
|                                      | At any time in the last 12 months been woken up at night by any attack of shortness of breath                             | 4 (0, 6%)                            | 0                                              | 4 (100%)                                        | 3 (75%)                             | 1 (25%)   | 1 (25%)                                       | 3 (75%)                                         |
| Other acute symptoms                 | Fever                                                                                                                     | 207 (34%)                            | 88 (43%)                                       | 119 (57%)                                       | 125 (60%)                           | 82 (40%)  | 75 (36%)                                      | 132 (64%)                                       |
|                                      | Headache                                                                                                                  | 160 (26%)                            | 65 (41%)                                       | 95 (59%)                                        | 97 (60%)                            | 63 (40%)  | 46 (29%)                                      | 114 (71%)                                       |
|                                      | Dizziness                                                                                                                 | 107 (17%)                            | 40 (37%)                                       | 67 (63%)                                        | 66 (62%)                            | 41 (38%)  | 32 (30%)                                      | 75 (70%)                                        |
|                                      | Fatigue                                                                                                                   | 93 (15%)                             | 44 (47%)                                       | 49 (53%)                                        | 63 (68%)                            | 30 (32%)  | 24 (26%)                                      | 69 (74%)                                        |
|                                      | Eye irritation                                                                                                            | 50 (8%)                              | 25 (50%)                                       | 25 (50%)                                        | 36 (72%)                            | 14 (28%)  | 10 (20%)                                      | 40 (80%)                                        |
|                                      | Frequency of eye, nose and throat irritation while cooking                                                                | 124 (37%) out of 348 cooking vendors | 47 (22%) out of the 210 indoor cooking vendors | 77 (56%) out of the 138 outdoor cooking vendors | 124(37%) out of 348 cooking vendors | N/A       | 38 (32%) out of the 120 cooking males vendors | 86 (38%) out of the 228 cooking females vendors |
|                                      | % of total                                                                                                                | 40%                                  | 62%                                            | 100%                                            | N/A                                 | 31%       | 69%                                           |                                                 |
| Never                                | 215 (62%)                                                                                                                 | 160 (74%)                            | 55 (26%)                                       | 215(100%)                                       | N/A                                 | 78 (36%)  | 137 (64%)                                     |                                                 |

|           |          |          |          |          |     |          |          |
|-----------|----------|----------|----------|----------|-----|----------|----------|
| Rarely    | 56 (16%) | 19 (34%) | 37 (66%) | 56(100%) | N/A | 21 (38%) | 35 (63%) |
| Sometimes | 62 (18%) | 26 (41%) | 36 (59%) | 62(100%) | N/A | 17 (27%) | 45 (73%) |
| Often     | 4 (1%)   | 1 (25%)  | 3 (75%)  | 4 (100%) | N/A | 0        | 4 (100%) |
| Always    | 2 (0.6%) | 1 (50%)  | 1 (50%)  | 2 (100%) | N/A | 0        | 2 (100%) |

**Table S2.** Prevalence of respiratory chronic diseases or illnesses among informal food vendors in the inner city of Johannesburg.

| Respiratory problems                                                               | Total No=617     | Work location |          | Type of vendor  |                     | Gender   |          |
|------------------------------------------------------------------------------------|------------------|---------------|----------|-----------------|---------------------|----------|----------|
|                                                                                    |                  | Indoor        | Outdoor  | Cooking vendors | Non-cooking vendors | Male     | Female   |
|                                                                                    |                  | N (%)         | N (%)    | N (%)           | N (%)               | N (%)    | N (%)    |
| <b>Chest illness in the last past three years</b>                                  | <b>9 (1, 5%)</b> |               |          |                 |                     |          |          |
| Which chest illness kept you from usual activities for as much as a week or longer |                  |               |          |                 |                     |          |          |
| Heart trouble                                                                      | 1 (0, 2%)        | 1 (100%)      | 0        | 1 (100%)        | 0                   | 0        | 1 (100%) |
| Bronchitis                                                                         | 1 (0, 2%)        | 0             | 1 (100%) | 0               | 1 (100%)            | 0        | 1 (100%) |
| Pulmonary tuberculosis                                                             | 1 (0, 2%)        | 0             | 1 (100%) | 0               | 1 (100%)            | 0        | 1 (100%) |
| Bronchial Asthma                                                                   | 5 (0, 8%)        | 2 (40%)       | 3 (60%)  | 3 (60%)         | 2 (40%)             | 2 (40%)  | 3 (60%)  |
| Hay fever resulting in Asthma                                                      | 1 (0, 2%)        | 0             | 1 (100%) | 1 (100%)        | 0                   | 0        | 1 (100%) |
| Other related information                                                          |                  |               |          |                 |                     |          |          |
| Bring up phlegm more than usual in any of the illness                              | 4 (0, 6%)        | 0             | 4 (100%) | 2 (50%)         | 2 (50%)             | 0        | 4 (100%) |
| Had more than 1 illness like this in the past 3 years                              | 9 (1,5%)         | 3 (33%)       | 6 (67%)  | 5 (56%)         | 4 (44%)             | 2 (22%)  | 7 (78%)  |
| <b>Past medically diagnosed diseases</b>                                           | <b>8 (1,3%)</b>  |               |          |                 |                     |          |          |
| Past illnesses: Have you ever been Medically diagnosed with any of these diseases? |                  |               |          |                 |                     |          |          |
| Bronchitis                                                                         | 1 (0, 2%)        | 0             | 1 (100%) | 0               | 1 (100%)            | 0        | 1 (100%) |
| Pulmonary tuberculosis                                                             | 2 (0,3%)         | 1 (50%)       | 1 (50%)  | 0               | 2 (100%)            | 1 (50%)  | 1 (50%)  |
| Bronchial Asthma                                                                   | 4 (0, 6%)        | 1 (25%)       | 3 (75%)  | 3 (75%)         | 1 (25%)             | 1 (25%)  | 3 (75%)  |
| Hay fever resulting in Asthma                                                      | 1 (0, 2%)        | 0             | 1 (100%) | 1 (100%)        | 0                   | 0        | 1 (100%) |
| Other illnesses                                                                    |                  |               |          |                 |                     |          |          |
| Covid-19 between 2020-2022                                                         | 105 (17%)        | 70 (67%)      | 35 (33%) | 46 (44%)        | 59 (56%)            | 46 (44%) | 59 (56%) |
